1  
2  
3  
4  
5  
6  
7  
8  
9  
10  
11  
12  
13  
14  
15  
16  
17  
18  
19  
20  
21  
22

## **A metabolic pathway for bile acid dehydroxylation by the gut microbiome**

Masanori Funabashi<sup>1,†,‡</sup>, Tyler L. Grove<sup>2,†</sup>, Victoria Pascal<sup>3</sup>, Yug Varma<sup>1</sup>, Molly E. McFadden<sup>4</sup>,  
Laura C. Brown<sup>4</sup>, Chunjun Guo<sup>1</sup>, Marnix H. Medema<sup>3</sup>, Steven C. Almo<sup>2\*</sup>, Michael A. Fischbach<sup>1\*</sup>

<sup>1</sup>Department of Bioengineering and ChEM-H, Stanford University, Stanford, CA 94305, USA

<sup>2</sup>Department of Biochemistry, Albert Einstein College of Medicine, Bronx, NY 10461, USA

<sup>3</sup>Bioinformatics Group, Wageningen University, Wageningen, Netherlands

<sup>4</sup>Department of Chemistry, Indiana University, Bloomington, IN 47405, USA

<sup>‡</sup>Current affiliation: Translational Research Department, Daiichi Sankyo RD Novare Co., Ltd., Tokyo, Japan

<sup>†</sup>These authors contributed equally.

\*Correspondence: [fischbach@fischbachgroup.org](mailto:fischbach@fischbachgroup.org), [steve.almo@einstein.yu.edu](mailto:steve.almo@einstein.yu.edu)

23 **ABSTRACT**

24           The gut microbiota synthesize hundreds of molecules, many of which are known to impact  
25 host physiology. Among the most abundant metabolites are the secondary bile acids deoxycholic  
26 acid (DCA) and lithocholic acid (LCA), which accumulate at ~500  $\mu$ M and are known to block *C.*  
27 *difficile* growth<sup>1</sup>, promote hepatocellular carcinoma<sup>2</sup>, and modulate host metabolism via the GPCR  
28 TGR5<sup>3</sup>. More broadly, DCA, LCA and their derivatives are a major component of the recirculating  
29 bile acid pool<sup>4</sup>; the size and composition of this pool are a target of therapies for primary biliary  
30 cholangitis and nonalcoholic steatohepatitis. Despite the clear impact of DCA and LCA on host  
31 physiology, incomplete knowledge of their biosynthetic genes and a lack of genetic tools in their  
32 native producer limit our ability to modulate secondary bile acid levels in the host. Here, we  
33 complete the pathway to DCA/LCA by assigning and characterizing enzymes for each of the steps  
34 in its reductive arm, revealing a strategy in which the A-B rings of the steroid core are transiently  
35 converted into an electron acceptor for two reductive steps carried out by Fe-S flavoenzymes.  
36 Using anaerobic in vitro reconstitution, we establish that a set of six enzymes is necessary and  
37 sufficient for the 8-step conversion of cholic acid to DCA. We then engineer the pathway into  
38 *Clostridium sporogenes*, conferring production of DCA and LCA on a non-producing commensal  
39 and demonstrating that a microbiome-derived pathway can be expressed and controlled  
40 heterologously. These data establish a complete pathway to two central components of the bile  
41 acid pool, and provide a road map for deorphaning and engineering pathways from the microbiome  
42 as a critical step toward controlling the metabolic output of the gut microbiota.

## 43 MAIN TEXT

44 The human gut microbiota harbor hundreds of pathways, most of which are encoded by genes that  
45 have not yet been identified<sup>5-8</sup>. Their small molecule products are of interest for three reasons: (i) Most  
46 derive predominantly or exclusively from the microbiota (i.e., there is no host source), and many enter the  
47 circulation, where they can have effects on peripheral tissues and organ systems. (ii) Their concentrations  
48 are similar to or exceed that of a typical drug; for example, indoxyl sulfate can accumulate in the human  
49 host at 130 mg/day<sup>9</sup>. Moreover, their concentration ranges are large, typically >10-fold<sup>10</sup>, which could help  
50 explain microbiome-mediated biological differences among people. (iii) Of the few high-abundance  
51 molecules whose biological functions are well understood, most are ligands for a key host receptor; for  
52 example, short-chain fatty acids modulate host immune function via GPR41/GPR43<sup>11-13</sup>. Thus, high-  
53 abundance, microbiota-derived molecules are responsible for a remarkably broad range of phenotypes  
54 conferred on the host by bacteria.

55 Among these pathways, 7 $\alpha$ -dehydroxylation of the primary bile acids cholic acid (CA) and  
56 chenodeoxycholic acid (CDCA) is particularly notable because the organisms that carry it out are present  
57 at very low abundance—an estimated 1:10<sup>6</sup> in a typical gut community<sup>14</sup>—yet they fully process a pool of  
58 primary bile acids that is ~1 mM in concentration<sup>15</sup>. Therefore, the flux through this pathway must be very  
59 high in the small subset of cells in which it operates, and the low-abundance organisms in the microbiome  
60 that perform this transformation have an unusually large impact on the pool of metabolites that enters the  
61 host. This pathway's products—deoxycholic acid (DCA) and lithocholic acid (LCA)—are the most abundant  
62 secondary bile acids in humans (up to 450-700  $\mu$ M in cecal contents)<sup>16</sup>, and are known to be important in  
63 three biological contexts: prevention of *Clostridium difficile* outgrowth<sup>1</sup>, induction of hepatocellular  
64 carcinogenesis<sup>2</sup>, and modulation of the host metabolic and immune responses<sup>17-19</sup>. More broadly, DCA,  
65 LCA, and their derivatives are a major component of the recirculating bile acid pool, representing >90% of  
66 the pool in the intestine and >25% in the gallbladder<sup>15</sup>. These microbiome-derived bile acids are therefore  
67 central to understanding the efficacy of therapeutics that target the bile acid pool and are approved or in  
68 clinical trials for primary biliary cholangitis and nonalcoholic steatohepatitis<sup>4</sup>.

69 In pioneering work, Hylemon and coworkers showed that the gut bacterium *Clostridium scindens*  
70 VPI 12708 carries out the 7 $\alpha$ -dehydroxylation of CA to produce DCA<sup>20</sup>. CA serves as an inducer of 7 $\alpha$ -  
71 dehydroxylation, leading to the discovery of a bile-acid-induced operon (termed *bai*) containing eight genes  
72 (**Fig. 1**)<sup>21</sup>. The postulated pathway consists of an oxidative arm in which four electrons are removed from  
73 the 3,7-dihydroxy moiety in the A/B ring system to generate a 3-oxo-4,5-6,7-didehydro intermediate,  
74 followed by a reductive arm in which six electrons are deposited to yield the 7-dehydroxylated product<sup>21</sup>  
75 (**Extended Data Fig. 1**). Through heterologous expression and characterization of individual *bai* gene  
76 products, enzymes have been attributed to each step of the oxidative arm of the pathway<sup>22-27</sup>, but the  
77 reductive arm of the pathway remains poorly characterized. Given that this pathway generates abundant

78 metabolites with broad biological impact, it is notable that the set of enzymes necessary and sufficient for  
79  $7\alpha$ -dehydroxylation have not yet been defined. A complete understanding of the pathway would enable  
80 efforts to control the composition of the bile acid pool by engineering the microbiome.

81 Here, by purifying and assaying pathway enzymes under anaerobic conditions, we reconstituted  
82  $7\alpha$ -dehydroxylation *in vitro*, demonstrating that a core set of six enzymes are necessary and sufficient for  
83 the conversion of CA to DCA and revealing an unusual redox strategy in which the steroid core is  
84 transiently converted into an electron acceptor. We then transferred the pathway from its genetically  
85 intractable producer *Clostridium scindens* into *Clostridium sporogenes*, conferring production of DCA and  
86 LCA on a non-producing commensal bacterial species. These data establish a complete pathway for two  
87 central components of the bile acid pool, and they provide a genetic basis for controlling the bile acid output  
88 of the microbiome.

### 90 **Biochemical reconstitution of bile acid $7\alpha$ -dehydroxylation**

91 We first set out to de-orphan the remaining steps in the  $7\alpha$ -dehydroxylation pathway. Since  
92 previous studies of the *bai* enzymes involved expressing them individually in *E. coli*, we reasoned that an  
93 alternative approach in which enzymes were purified, mixed, and assayed *in vitro* could help delineate the  
94 set of enzymes necessary and sufficient for  $7\alpha$ -dehydroxylation. Given that the eight-gene *bai* operon is  
95 shared among all known  $7\alpha$ -dehydroxylating strains, we focused our efforts on the enzymes encoded by  
96 the operon. We cloned three orthologs of each enzyme, expressed them individually in *E. coli* under micro-  
97 aerobic conditions, and purified them anaerobically as N-terminal His<sub>6</sub> fusions. Using this strategy, we  
98 obtained at least one soluble, purified ortholog of each Bai enzyme (**Extended Data Fig. 2**). When we  
99 incubated a mixture of the purified Bai enzymes with CA, NAD<sup>+</sup>, coenzyme A, and ATP under anaerobic  
100 conditions and monitored the reaction by LC-MS, we observed the time-dependent conversion of CA to  
101 DCA, indicating that the combination of BaiB, BaiCD, BaiA2, BaiE, BaiF, and BaiH is sufficient for  $7\alpha$ -  
102 dehydroxylation; no additional enzymes are required (**Fig. 2a, b**).

103 To test our hypotheses regarding the order of steps in the pathway, we performed stepwise  
104 reconstitutions in which enzymes were added one at a time and intermediates were allowed to build up at  
105 each step in the pathway (**Fig. 2c**). From these data, we draw two conclusions: First, the six enzymes used  
106 in the reconstitution are not just sufficient but also necessary, and the pathway proceeds according to the  
107 scheme shown in **Fig. 4**. We directly observed mass ions consistent with each of the proposed  
108 intermediates, providing direct evidence for the previously proposed portion of the biosynthetic route. In  
109 spite of its conservation in all known dehydroxylating species, BaiI is dispensable for CA dehydroxylation  
110 *in vitro*. Since BaiI is a predicted  $\Delta^5$ -ketosteroid isomerase, it may process a substrate other than CA, likely  
111 one with a 4,5- or 5,6-olefin.

112 Second, to our surprise, the absence of BaiH caused the pathway to stall at the highly oxidized  
113 intermediate 3-oxo-4,5,6,7-didehydro-DCA, and its addition resulted in two successive 2e<sup>-</sup> reductions to  
114 form 3-oxo-DCA. BaiH had previously been proposed to oxidize an alternative substrate, 3-oxo-4,5-  
115 dehydro-UDCA<sup>25</sup>, so a potential role in the reductive arm of the pathway was unexpected. To explore this  
116 finding further, we incubated purified BaiH with synthetic 3-oxo-4,5-6,7-didehydro-DCA; we observed that  
117 the enzyme catalyzes a 2e<sup>-</sup> reduction to 3-oxo-4,5-dehydro-DCA, but does not reduce this intermediate  
118 further (**Fig. 3e**). Notably, 3-oxo-4,5-dehydro-DCA does not build up in the reconstitution reaction  
119 containing BaiH, suggesting that another enzyme present in the mixture catalyzes the second reductive  
120 step. Hypothesizing that the BaiH homolog BaiCD catalyzes the second reductive step, we incubated it  
121 with synthetic 3-oxo-4,5-dehydro-DCA, revealing that it reduces this substrate to 3-oxo-DCA (**Extended**  
122 **Data Fig. 3**). Together, these data show that the pathway employs an unusual redox strategy in which the  
123 A and B rings of the steroid core are converted into a highly oxidized intermediate, 3-oxo-4,5-6,7-  
124 didehydro-DCA; and that the two key reductive steps are catalyzed by two homologous enzymes in the  
125 Fe-S flavoenzyme superfamily, BaiH and BaiCD.

126 Finally, the last step in the pathway—reduction of 3-oxo-DCA to DCA—is carried out by BaiA2, as  
127 confirmed by assaying purified BaiA2 alone (**Extended Data Fig. 4**). Thus, BaiA2 and BaiCD both act  
128 twice in the pathway, catalyzing its first two and last two redox steps.

129

### 130 **Engineering the 7 $\alpha$ -dehydroxylation pathway into *C. sporogenes***

131 Having determined the set of enzymes that are necessary and sufficient for the pathway, we sought  
132 to gain genetic control over the pathway as a first step toward engineering the bile acid output of the gut  
133 community. We began by attempting to construct a mutation in the *baiCD* gene of the native producer, *C.*  
134 *scindens*, using the ClosTron group II intron system; however, we were unsuccessful due to an inability to  
135 introduce DNA constructs into *C. scindens* by conjugation. As an alternative approach, we considered  
136 expressing the *bai* pathway in a gut commensal that is unable to carry out 7 $\alpha$ -dehydroxylation; however,  
137 methods for transferring pathways in *Clostridium* are underdeveloped. The pathways for isobutanol (five  
138 genes) and 1,3-propanediol (three genes) have been transferred into *C. cellulolyticum* and *C.*  
139 *acetobutylicum*<sup>28,29</sup>, and a functional mini-cellulosome operon was introduced into the genome of *C.*  
140 *acetobutylicum*<sup>30</sup>. But to our knowledge, no more than a few genes have been transferred into *Clostridium*,  
141 and no pathway from the human microbiome has been mobilized from one *Clostridium* species to another.

142 We selected *Clostridium sporogenes* ATCC 15579 as the recipient for two reasons: it is related to  
143 *C. scindens*, making it likely that ancillary metabolic requirements for the pathway (e.g., cofactor  
144 biogenesis) would be met; and genetic tools have been developed that enable plasmids to be transformed  
145 into *C. sporogenes*<sup>31</sup>. Our initial attempts to clone the entire 8-gene *bai* operon (*baiB-baiI*) into an *E. coli*-  
146 *C. sporogenes* shuttle vector failed to yield clones harboring the complete operon. Reasoning that there

147 might be a gene in the cluster that is toxic to *E. coli*, we cloned various fragments of the cluster under the  
148 control of different promoters (detailed in **Supplementary Table 1**), eventually managing to split the cluster  
149 into three pieces, each in its own *E. coli*-*C. sporogenes* shuttle vector: *baiB-baiF* in pMTL83153 (pMF01),  
150 *baiG* in pMTL83353 (pMF02), and *baiH-baiI* in pMTL83253 (pMF03) (**Fig. 3a**, **Extended Data Fig. 5**).  
151 Genes in pMF01 and pMF03 were placed under the control of the *spoIIIE* promoter from *C. sporogenes*  
152 ATCC 15579, which is expressed during the late stages of *Clostridium* growth<sup>32</sup>, while *baiG* in pMF02 was  
153 driven by the strong *fdx* promoter. We conjugated these plasmids sequentially into *C. sporogenes* to yield  
154 strain MF001.

155 When incubated with CA, MF001 produces DCA in a time-dependent manner, in contrast to a  
156 control strain that harbors only the transporter (*baiG*) (**Fig. 3b, c**), which does not. Additionally, MF001  
157 converts CDCA to LCA (**Extended Data Fig. 6**). These data show that the eight genes in the core *bai*  
158 cluster (**Fig. 1**) are sufficient to confer bile acid 7 $\alpha$ -dehydroxylation on *C. sporogenes*, although they do  
159 not rule out the participation of one or more genes endogenous to *C. sporogenes*.

160

### 161 **Identifying branch points in the 7 $\alpha$ -dehydroxylation pathway**

162 To uncover potential branch points for engineering the biosynthesis of non-native pathway  
163 products, we constructed a set of strains in which each of the eight genes were individually deleted  
164 (**Extended Data Fig. 5**). We grew these strains with CA and assayed their culture supernatant for the  
165 build-up of intermediates (**Fig. 3d**). Deletion of genes encoding enzymes in the oxidative arm of the  
166 pathway resulted in the buildup of early pathway intermediates, as expected. Two exceptions were the  
167 *baiE* mutant, which produced only cholyl-CoA, potentially due to a polar effect on the transcription of  
168 downstream genes; and the *baiF*-deficient strain, which generated a small quantity of the final product  
169 DCA, suggesting there might be a compensatory CoA hydrolase (of note, *C. sporogenes* harbors two *baiF*  
170 homologs, CLOSPO\_02756 and CLOSPO\_00308), or that non-enzymatic hydrolysis of the CoA thioester  
171 happens to some extent *in vivo*.

172 Intriguingly, the *baiH* mutant accumulates a key intermediate in the reductive arm of the pathway,  
173 3-oxo-4,5-6,7-didehydro-DCA (**Fig. 3d**), supporting our finding that BaiH catalyzes the first reductive step  
174 in the pathway and providing genetic access to a key intermediate in the pathway. Moreover, strains of *C.*  
175 *sporogenes* expressing BaiG/BaiH and BaiG/BaiCD convert, respectively, 3-oxo-4,5-6,7-didehydro-DCA  
176 to 3-oxo-4,5-dehydro-DCA and 3-oxo-4,5-dehydro-DCA to 3-oxo-DCA (**Fig. 3e**), providing access to  
177 intermediates that do not accumulate in a culture of *C. scindens*. Notably, the fully oxidized and partially  
178 reduced intermediates are branch points for the production of alternative bile acid metabolites including  
179 *allo* (5 $\alpha$ ) bile acids, which have important biological activities including the induction of regulatory T cells<sup>33</sup>.  
180 Thus, gaining genetic control over the pathway by expressing it in an alternative gut provides opportunities

181 for rational and deliberate control of bile acid metabolism and the production of alternative molecules with  
182 distinct biological properties.

183

### 184 **7 $\alpha$ -dehydroxylation as a model for other microbiome-derived pathways**

185 These results establish the complete 7 $\alpha$ -dehydroxylation pathway, bringing this pathway closer to  
186 the level of knowledge we have about endogenous human metabolic pathways. Our work underscores  
187 that little is known about the biochemistry of metabolic pathways in the microbiome, in spite of the fact that  
188 they operate inside the human organism and produce abundant molecules that modulate host biology.

189 Key features of the bile acid 7 $\alpha$ -dehydroxylation pathway might serve as a model for other  
190 pathways that produce high-abundance metabolites in the gut. We demonstrate that the reductive half of  
191 the pathway, which was previously uncharacterized, is centered around two reductions catalyzed by  
192 members of the Fe-S flavoenzyme superfamily<sup>34</sup>. Importantly, Fe-S flavoenzymes are known for shuttling  
193 electrons from the membrane to an organic (non-O<sub>2</sub>) terminal electron acceptor, enabling an anaerobic  
194 electron transport chain<sup>35</sup>. Moreover, the chemical logic of 7 $\alpha$ -dehydroxylation is similar to that of other  
195 pathways used to support anaerobic electron transport chains. Here, a 4e<sup>-</sup> oxidation along the bottom of  
196 the A and B rings creates an enone with an acidic  $\gamma$ -proton, setting up a vinylogous dehydration of the 7-  
197 hydroxyl. The resulting dienone undergoes a 6e<sup>-</sup> reduction (three successive 2e<sup>-</sup> reductions), which nets  
198 the organism a 2e<sup>-</sup> reduction per molecule of primary bile acid. The key intermediate—an  $\alpha,\beta,\gamma,\delta$ -  
199 unsaturated ketone—is chemically similar to other oxidized intermediates that serve as electron acceptors  
200 in pathways from the microbiome, including fumarate, the electron acceptor for the *Bacteroides* anaerobic  
201 electron transport chain<sup>36</sup>; and aryl acrylic acids, which are electron acceptors for a subset of anaerobic  
202 Firmicutes<sup>35</sup> (**Fig. 4**). The extended conjugation in these  $\alpha,\beta$ - and  $\alpha,\beta,\gamma,\delta$ -unsaturated molecules allows  
203 them to serve as efficient electron acceptors. Although their redox potentials are lower than O<sub>2</sub>, they are  
204 well-suited for an anaerobic niche in which diffusible organic molecules are the most readily accessible  
205 alternative.

206

### 207 **Engineering pathways from the microbiome**

208 The gut microbiome harbors hundreds of pathways, many of which likely modulate host biology,  
209 but to date these pathways have not been a target of engineering. This stands in contrast to natural product  
210 pathways from terrestrial and marine microorganisms and plants, which are commonly expressed in  
211 heterologous hosts<sup>37,38</sup> and engineered to generate non-native products<sup>39</sup>. Two technology gaps need to  
212 be overcome in order to make microbiome-derived pathways amenable to engineering: (i) efficient  
213 strategies for identifying pathways for known metabolites and small molecule products of orphan gene  
214 clusters, and (ii) tools for transferring pathways into bacterial hosts native to the gut and manipulating them  
215 to produce novel molecules. The work described here is a starting point for these efforts, and provides set

216 of tools for deorphaning, heterologously expressing, and engineering pathways from *Clostridium* as a new  
217 way of controlling the chemical output of the microbiome.

218

## 219 **METHODS**

### 220 **Bacterial strains, culture conditions, and bile acids**

221 *Clostridium scindens* VPI 12708 and *Clostridium sporogenes* ATCC 15579 were obtained from the  
222 Japan Collection of Microorganisms (JCM) and the American Type Culture Collection (ATCC),  
223 respectively. Engineered *C. sporogenes* strains used in this study are shown in **Supplementary Table 2**.  
224 They were cultured in TYG (3% w/v tryptone, 2% w/v yeast extract, 0.1% w/v sodium thioglycolate) broth  
225 at 37 °C in an anaerobic chamber from Coy Laboratories. *Escherichia coli* CA434 (HB101/pRK24) was  
226 cultured at 37 °C in LB broth supplemented with 12 µg/mL tetracycline and 100 µg/mL carbenicillin. In  
227 addition, 20 µg/mL chloramphenicol, 100 µg/mL spectinomycin or 250 µg/mL erythromycin was used for  
228 the selection of series of plasmids of pMTL83153, pMTL83353 or pMTL83253 respectively. Plasmids used  
229 in this study are shown in **Supplementary Table 1**. Cholic acid (**1**), chenodeoxycholic acid, deoxycholic  
230 acid (**9**) and lithocholic acid were purchased from Sigma-Aldrich. 3-oxo-cholic acid (**3b**) and 3-oxo-  
231 deoxycholic acid (**8**) were purchased from Steraloids. 3-oxo-4,5,6,7-didehydro-DCA (**6**) and 3-oxo-4,5-  
232 dehydro-DCA (**7**) were synthesized using previously reported procedures<sup>40</sup>. Structural assignments for the  
233 remaining pathway intermediates and derivatives shown in **Fig. 2** and **Fig. 3** are provisional, and were  
234 made on the basis of mass spectra, retention times, and comparison to chemically related standards.

235

### 236 **Cloning of the *bai* operon**

237 All PCR amplification was conducted using PrimeSTAR Max DNA polymerase (Takara Bio)  
238 according to the manufacturer's instructions. Sequences of primers for target genes and cloning vectors  
239 were shown in **Supplementary Table 3**. For the heterologous expression of *bai* genes under *fdx* promoter,  
240 pMTL vectors were amplified with primers 1 and 2. For the expression of *bai* genes under *spolIE* promoter,  
241 pMTL vectors harboring *spolIE* promoter was constructed at first. pMTL vectors were amplified with  
242 primers 1 and 3 to remove the *fdx* promoter and *spolIE* promoter region, which is the 277 bp sequence  
243 upstream of CLOSPO\_01065, was amplified with primers 4 and 5. Then these two PCR fragments were  
244 assembled by overlap PCR. The target gene sequences were amplified with the primers pair shown in  
245 **Supplementary Table 3**. PCR fragments were assembled with the amplified fragments of vectors using  
246 Gibson assembly kit (New England Bio Labs). *E. coli* Stbl4 competent cells (Invitrogen) were transformed  
247 with the assembled plasmids by electroporation and transformants were confirmed by PCR. Positive  
248 clones harboring assembled plasmids were cultivated, and the plasmid was obtained by miniprep and  
249 verified by sequencing.

250



## 251 **Heterologous expression in *C. sporogenes***

252 For the heterologous expression experiments, plasmids were transferred into *C. sporogenes* by  
253 conjugation using *E. coli* CA434. *E. coli* CA434 was electroporated with the individual plasmids and  
254 recovered overnight in selective media. 1 mL of overnight culture of the resultant transformants was  
255 harvested. The cell pellet was washed with PBS to remove residual antibiotics and re-suspended with 200  
256  $\mu$ L of an overnight culture of *C. sporogenes* in anaerobic chamber. Eight drops of 25  $\mu$ L of the suspension  
257 were pipetted on TYG agar plate without antibiotics and the plate was incubated anaerobically at 37 °C for  
258 2 days. The bacterial biomass was scraped up and resuspended in 300  $\mu$ L of PBS. The whole cell  
259 suspension was then plated on TYG agar plates supplemented with 250  $\mu$ g/mL D-cycloserine and  
260 appropriate antibiotics (15  $\mu$ g/mL thiamphenicol for pMTL83153, 500  $\mu$ g/mL spectinomycin for pMTL83353  
261 or 5  $\mu$ g/mL erythromycin for pMTL83253). After a few days, antibiotic resistant colonies were picked and  
262 re-streaked on agar containing the same antibiotic. The resulting clones were confirmed by PCR  
263 amplification using appropriate primers (**Supplementary Table 3**). Multiple plasmids were introduced  
264 sequentially, using the same procedure.

265

## 266 **Extraction of metabolites**

267 Engineered strains were cultured anaerobically in TYG medium supplemented with appropriate  
268 antibiotics from frozen glycerol stocks. 10  $\mu$ L of the overnight culture was inoculated in 1 mL of TYG  
269 medium supplemented with appropriate antibiotics and 1  $\mu$ M substrate. After 72 hr, unless otherwise noted,  
270 the culture was extracted with 20% acetone and centrifuged. The supernatant was analyzed by LC/MS.

271

## 272 **LC/MS analysis of metabolite extracts**

273 Metabolite extracts were analyzed using an Agilent 1290 LC system coupled to an Agilent 6530  
274 QTOF with a 1.7  $\mu$ m, 2.1 x 100 mm Kinetex C18 column (Phenomenex). Water with 0.05% formic acid (A)  
275 and acetone with 0.05% formic acid (B) was used as the mobile phase at a flow rate of 0.35 mL/min over  
276 a 32 min gradient: 0-1 min, 25% B; 1-25 min, 25-75% B; 25-26 min, 75-100% B; 26-30 min, 100% B; 30-  
277 32 min 75-25% B. All data were collected in negative ion mode.

278 For detection of CoA conjugates, a 1.8  $\mu$ m, 2.1 x 50 mm ZORBAX SB-C18 column (Agilent  
279 Technologies) and water with 10 mM ammonium acetate pH 9.0 (A) and acetonitrile (B) was used. A flow  
280 rate of 0.3 mL/min was used over the 17 min gradient: 0-2 min, 15% B; 2-14 min, 15-50% B; 14-14.1 min  
281 50-95% B, 14.1-17 min, 85% B. All data were collected in positive ion mode.

282

## 283 **Cloning of *bai* operon genes**

284 To increase the probability of assembling a complete *bai* operon, we cloned the genes encoding  
285 *baiB*, *baiA2*, *baiCD*, *baiE*, *baiF*, and *baiH* from *Clostridium scindens* VPI12708, *Clostridium hylemonae*,

286 and *Clostridium hiranonis* using the primers in **Supplementary Table 4** and the KOD Xtreme™ Hot Start  
287 PCR kit (Millipore) following the manufacturers protocol. Each PCR amplified gene contains ligation  
288 independent cloning (LIC) sites that are complimentary to the pSGC vector. The PCR products were  
289 purified with the Agencourt Ampure XP PCR clean-up kit (Beckman Coulter) according to the  
290 manufacturers protocol. The pSGC vector was prepared for LIC by linearization with the restriction enzyme  
291 BsaI. LIC sites were installed by adding T4 DNA polymerase (NEB) to 10 µg of linearized plasmid in a 50  
292 µL reaction containing 2.5 mM GTP, 1 X NEB Buffer 2, and 1 X BSA for 1 hr at 22 °C. T4 DNA polymerase  
293 was heat-inactivated by incubation at 75 °C for 20 min. The 2 µL of the PCR products were also treated  
294 with T4 DNA polymerase in a 10 µL reaction containing 2.5 mM CTP, 1 X NEB Buffer 2, and 1 X BSA for  
295 1 hr at 22 °C. T4 DNA polymerase was heat inactivated. The LIC reaction was carried out by mixing 15  
296 ng of digested vector with ~ 40 ng of digested PCR product with a subsequent incubation at 22 °C for 10  
297 min. A 30 µL aliquot of DH10b cells (NEB) were transformed with 2 µL of the above mixture using standard  
298 bacterial transformation protocols. Cloning the genes into pSGC with this method adds a His<sub>6</sub> tag to the N-  
299 terminus of each protein with the following sequence: MHHHHHSSGVDLGATENLYFQS. All final  
300 constructs were sequence-verified (Genescript).

301

### 302 **Expression and purification of BaiH and BaiCD**

303 BL-21(DE3) cells containing the pPH151 plasmid were transformed with the pSGC plasmid  
304 containing either BaiCD or BaiH. The transformants were selected on an LB/agar plate containing 50  
305 µg/mL kanamycin and 34 µg/mL chloramphenicol. A single colony was used to inoculate 20 mL of LB  
306 overnight culture containing the above antibiotics. The overnight culture was used to inoculate 2 L of  
307 Studier's auto induction media (ZYP-5052 supplemented with 1 mM flavin mononucleotide and 200 µM  
308 FeCl<sub>3</sub>) housed in a 2 L PYREX® media bottle. Cultures were grown with constant aeration using a sparging  
309 stone attached to a pressurized, 0.22 µm filtered air source all in a water bath maintained at 37 °C. After  
310 5 hr, aeration was stopped and the culture was placed in an ice bath for 1 hr. The culture was returned to  
311 a 22 °C water bath and light aeration was resumed. After 5 min, cysteine was added to a final concentration  
312 of 600 µM. The culture was grown at 22 °C for ~ 20 hr before being harvested by centrifugation at 10,000  
313 x g. Cell pellets were flash frozen and stored in liquid N<sub>2</sub> until purification. All subsequent steps were  
314 carried out in an MBraun anaerobic chamber maintained at < 0.1 ppm oxygen (MBraun, Stratham, NH).  
315 Plastics were brought into the chamber and allowed to sit for two weeks before use. All solvents and buffer  
316 stocks were degassed by sparging with argon gas for 4 hr before being taken into the chamber. In a typical  
317 purification, ~30 grams of BaiCD or BaiH cell paste was resuspended in 30 mL of lysis buffer containing  
318 50 mM HEPES, pH 7.5, 300 mM KCl, 4 mM imidazole, 10 mM 2-mercaptoethanol (BME), 10% glycerol, 1  
319 mM FMN, 1 mM FAD, and 1% Triton-X305. The resuspension was subjected to 50 rounds of sonic  
320 disruption (80% output, 3 s pulse on, 12 s pulse of) at 4 °C. The lysate was cleared by centrifugation at 4

321 °C for 1 hr at 15,000 × g. The supernatant was loaded with an ÄKTA express FPLC system onto a 5 mL  
322 fast-flow HisTrap™ column (GE Healthcare Life Sciences) equilibrated in lysis buffer lacking FMA, FAD,  
323 and Triton-X305. The column was washed with 10 column volumes of lysis buffer before elution with 5 mL  
324 of buffer containing 50 mM HEPES, pH 7.5, 300 mM KCl, 300 mM imidazole, 10 mM BME, and 10%  
325 glycerol. The fractions containing protein, based on absorbance at 280 nm, were pooled and reconstituted  
326 with Fe and sulfur as previously described. The reconstituted proteins were then passed over a HiPrep  
327 16/60 Sephacryl S-200 HR column equilibrated in 20 mM HEPES, pH 7.5, 300 mM KCl, 5 mM DTT, and  
328 10% glycerol. The proteins were concentrated to ~ 1 mL with a vivaspin 20 concentrator (Sartorius Stedium  
329 Biotech). The protein concentration was estimated by  $A_{280}$  using the extinction coefficient calculated based  
330 on its corresponding amino acid sequence.

### 331 332 **Expression and purification of BaiB, BaiA2, BaiE, and BaiF**

333 BL-21(DE3) cells containing the pRIL plasmid were transformed with the plasmid containing BaiB,  
334 BaiA2, BaiE, or BaiF. Each transformant was selected on an LB/agar plate containing 50 µg/mL kanamycin  
335 and 34 µg/mL chloramphenicol. A single colony was used to inoculate 20 mL of LB overnight culture  
336 containing the above antibiotics. The overnight culture was used to inoculate 2 L of Studier's auto induction  
337 media (ZYP-5052) housed in a 2 L PYREX® media bottle. Cultures were grown with constant aeration  
338 using a sparging stone attached to a pressurized, 0.22 µm filtered air source in a water bath at 37 °C.  
339 After 5 hr, aeration was stopped and the culture was placed in an ice bath for 1 hr. The culture was  
340 returned to a 22 °C water bath and light aeration was resumed. The culture was grown at 22 °C for ~ 20  
341 hr before being harvested by centrifugation at 10,000 × g. Cell pellets were flash frozen and stored in liquid  
342 N<sub>2</sub> until purification. All subsequent steps were carried out in an MBraun anaerobic chamber maintained  
343 at < 0.1 ppm oxygen as above with minor modifications. Briefly, a typical purification, ~ 30 – 40 grams of  
344 cell paste was resuspended in 30 – 40 mL of lysis buffer containing 50 mM HEPES, pH 7.5, 300 mM KCl,  
345 4 mM imidazole, 10 mM 2-mercaptoethanol (BME), 10% glycerol, and 1% Triton-X305. The resuspension  
346 was subjected to 50 rounds of sonic disruption (80% output, 3 s pulse on, 12 s pulse of) at 4 °C. The lysate  
347 was cleared by centrifugation at 4 °C for 1 hr at 15,000 × g. The supernatant was loaded with an ÄKTA  
348 express FPLC system onto a 5 mL fast-flow HisTrap™ column (GE Healthcare Life Sciences) equilibrated  
349 in lysis buffer lacking Triton-X305. The column was washed with 10 column volumes of lysis buffer before  
350 elution with 5 mL of buffer containing 50 mM HEPES, pH 7.5, 300 mM KCl, 300 mM imidazole, 10 mM  
351 BME, and 10% glycerol. The fractions containing protein, based on absorbance at 280 nm, were pooled  
352 and immediately passed over a HiPrep 16/60 Sephacryl S-200 HR column equilibrated in 20 mM HEPES,  
353 pH 7.5, 300 mM KCl, 5 mM DTT, and 10% glycerol. The proteins were concentrated to ~ 1 mL with a  
354 vivaspin 20 concentrator (Sartorius Stedium Biotech). The protein concentration was estimated by  $A_{280}$   
355 using the extinction coefficient calculated based on its corresponding amino acid sequence.

356

### 357 **Bile acid pathway *in vitro* reconstitution**

358 Six assays each contained 50 mM HEPES pH 7.5, 50 mM KCl, 200  $\mu$ M NAD, 100  $\mu$ M CoA, and  
359 200  $\mu$ M ATP. In addition, each assay contained 0.1 mM of 1-6 of the following enzymes: BaiB from *C.*  
360 *scindens*, BaiA2 from *C. scindens*, BaiCD from *C. hiranonis*, BaiE from *C. hiranonis*, BaiF from *C.*  
361 *hylemonae*, and BaiH from *C. scindens*. All reactions were initiated with the addition of cholic acid and  
362 incubated at 22 °C for 30 min before being quenched by the additions of an equal volume of 100 % acetone.  
363 Each assay was performed in triplicate. Product formation was monitored by LC/MS described above.

364

### 365 **Bile acid pathway *in vitro* reconstitution kinetics**

366 To determine the rate of DCA production by the *in vitro* pathway, assays were performed with 50  
367 mM HEPES pH 7.5, 50 mM KCl, 200  $\mu$ M NAD, 100  $\mu$ M CoA, and 200  $\mu$ M ATP, 0.1 mM of BaiB from *C.*  
368 *scindens*, BaiA2 from *C. scindens*, BaiCD from *C. hiranonis*, BaiE from *C. hiranonis*, BaiF from *C.*  
369 *hylemonae*, and BaiH from *C. scindens*. Reactions were initiated with the addition of cholic acid and  
370 incubated at 22 °C. Samples of the reaction were removed and mixed with an equal volume (100 mM  
371 H<sub>2</sub>SO<sub>4</sub> at designated times. Each assay was performed in triplicate. Product formation was monitored by  
372 LC/MS described above.

373

### 374 **$K_M$ assay for BaiCD**

375 Kinetic parameters for BaiCD from *C. hiranonis* were determined in assays that contained 1  $\mu$ M  
376 enzyme, 50 mM HEPES pH 7.5, 50 mM KCl, and 500  $\mu$ M NADH. Reactions mixtures were incubated for  
377 5 min at 22 °C before being initiated with 3-oxo-4,5-dehydro-deoxycholic acid. Concentrations of substrate  
378 were varied between 3.91  $\mu$ M and 500  $\mu$ M. 20  $\mu$ L samples were removed and mixed with an equal volume  
379 of 100 mM H<sub>2</sub>SO<sub>4</sub> to stop the reaction. Product formation was determined by LC/MS described above.  
380 Reactions were performed in triplicate and the data were fit to the Michaelis-Menten equation by the least  
381 squares method.

382

### 383 **$K_M$ assay for BaiH**

384 Kinetic parameters for BaiH from *C. scindens* were determined in assays that contained 0.45  $\mu$ M  
385 enzyme, 50 mM HEPES pH 7.5, 50 mM KCl, and 500  $\mu$ M NADH. Reactions mixtures were incubated for  
386 5 min at 22 °C before being initiated with 3-oxo-4,5,6,7-didehydro-deoxycholic acid. Concentrations of  
387 substrate were varied between 0.78  $\mu$ M and 100  $\mu$ M. 20  $\mu$ L samples were removed and mixed with an  
388 equal volume 100 mM H<sub>2</sub>SO<sub>4</sub> to stop the reaction. Product formation was determined by LC/MS described  
389 above. Reactions were performed in triplicate and the data were fit to the Michaelis-Menten equation by  
390 the least squares method.

391

## 392 REFERENCES

- 393 1. Buffie, C. G. *et al.* Precision microbiome reconstitution restores bile acid mediated resistance to  
394 *Clostridium difficile*. *Nature* **517**, 205–208 (2015).
- 395 2. Yoshimoto, S. *et al.* Obesity-induced gut microbial metabolite promotes liver cancer through  
396 senescence secretome. *Nature* **499**, 97–101 (2013).
- 397 3. Duboc, H., Taché, Y. & Hofmann, A. F. The bile acid TGR5 membrane receptor: from basic research  
398 to clinical application. *Dig. Liver Dis.* **46**, 302–312 (2014).
- 399 4. Arab, J. P., Karpen, S. J., Dawson, P. A., Arrese, M. & Trauner, M. Bile acids and nonalcoholic fatty  
400 liver disease: Molecular insights and therapeutic perspectives. *Hepatology* **65**, 350–362 (2017).
- 401 5. Nicholson, J. K. *et al.* Host-gut microbiota metabolic interactions. *Science* **336**, 1262–1267 (2012).
- 402 6. Lee, W.-J. & Hase, K. Gut microbiota-generated metabolites in animal health and disease. *Nat.*  
403 *Chem. Biol.* **10**, 416–424 (2014).
- 404 7. Koppel, N., Maini Rekdal, V. & Balskus, E. P. Chemical transformation of xenobiotics by the human  
405 gut microbiota. *Science* **356**, (2017).
- 406 8. Donia, M. S. & Fischbach, M. A. HUMAN MICROBIOTA. Small molecules from the human  
407 microbiota. *Science* **349**, 1254766 (2015).
- 408 9. Patel, K. P., Luo, F. J.-G., Plummer, N. S., Hostetter, T. H. & Meyer, T. W. The production of p-  
409 cresol sulfate and indoxyl sulfate in vegetarians versus omnivores. *Clin. J. Am. Soc. Nephrol.* **7**,  
410 982–988 (2012).
- 411 10. Bouatra, S. *et al.* The human urine metabolome. *PLoS One* **8**, e73076 (2013).
- 412 11. Furusawa, Y. *et al.* Commensal microbe-derived butyrate induces the differentiation of colonic  
413 regulatory T cells. *Nature* **504**, 446–450 (2013).
- 414 12. Maslowski, K. M. *et al.* Regulation of inflammatory responses by gut microbiota and chemoattractant  
415 receptor GPR43. *Nature* **461**, 1282–1286 (2009).
- 416 13. Smith, P. M. *et al.* The microbial metabolites, short-chain fatty acids, regulate colonic Treg cell  
417 homeostasis. *Science* **341**, 569–573 (2013).
- 418 14. Wells, J. E., Berr, F., Thomas, L. A., Dowling, R. H. & Hylemon, P. B. Isolation and characterization  
419 of cholic acid 7 $\alpha$ -dehydroxylating fecal bacteria from cholesterol gallstone patients. *J. Hepatol.* **32**,  
420 4–10 (2000).
- 421 15. Ridlon, J. M., Kang, D.-J. & Hylemon, P. B. Bile salt biotransformations by human intestinal bacteria.  
422 *J. Lipid Res.* **47**, 241–259 (2006).
- 423 16. Hamilton, J. P. *et al.* Human cecal bile acids: concentration and spectrum. *Am. J. Physiol.*  
424 *Gastrointest. Liver Physiol.* **293**, G256-63 (2007).
- 425 17. de Aguiar Vallim, T. Q., Tarling, E. J. & Edwards, P. A. Pleiotropic roles of bile acids in metabolism.  
426 *Cell Metab.* **17**, 657–669 (2013).
- 427 18. Wahlström, A., Sayin, S. I., Marschall, H.-U. & Bäckhed, F. Intestinal Crosstalk between Bile Acids  
428 and Microbiota and Its Impact on Host Metabolism. *Cell Metab.* **24**, 41–50 (2016).
- 429 19. Brestoff, J. R. & Artis, D. Commensal bacteria at the interface of host metabolism and the immune  
430 system. *Nat. Immunol.* **14**, 676–684 (2013).
- 431 20. Lipsky, W. R. L., Fricke, R. J. & Hylemon, P. B. Bile acid induction specificity of 7 $\alpha$ -dehydroxylase  
432 activity in an intestinal Eubacterium species. *Steroids* (1980).
- 433 21. Ridlon, J. M., Harris, S. C., Bhowmik, S., Kang, D.-J. & Hylemon, P. B. Consequences of bile salt  
434 biotransformations by intestinal bacteria. *Gut Microbes* **7**, 22–39 (2016).
- 435 22. Mallonee, D. H., Lijewski, M. A. & Hylemon, P. B. Expression in *Escherichia coli* and  
436 characterization of a bile acid-inducible 3 $\alpha$ -hydroxysteroid dehydrogenase from *Eubacterium* sp.  
437 strain VPI 12708. *Curr Microbiol* (1995).
- 438 23. Mallonee, D. H., Adams, J. L. & Hylemon, P. B. The bile acid-inducible baiB gene from *Eubacterium*  
439 sp. strain VPI 12708 encodes a bile acid-coenzyme A ligase. *J. Bacteriol.* **174**, 2065–2071 (1992).
- 440 24. Bhowmik, S. *et al.* Structural and functional characterization of BaiA, an enzyme involved in  
441 secondary bile acid synthesis in human gut microbe. *Proteins: Structure, Function, and*  
442 *Bioinformatics* **82**, 216–229 (2013).

- 443 25. Kang, D.-J., Ridlon, J. M., Moore, D. R., Barnes, S. & Hylemon, P. B. Clostridium scindens baiCD  
444 and baiH genes encode stereo-specific 7 $\alpha$ /7 $\beta$ -hydroxy-3-oxo- $\delta$ 4-cholenoic acid  
445 oxidoreductases. *Biochim. Biophys. Acta* **1781**, 16–25 (2008).
- 446 26. Dawson, J. A., Mallonee, D. H., Björkhem, I. & Hylemon, P. B. Expression and characterization of a  
447 C24 bile acid 7  $\alpha$ -dehydratase from Eubacterium sp. strain VPI 12708 in Escherichia coli. *J.*  
448 *Lipid Res.* **37**, 1258–1267 (1996).
- 449 27. Ye, H. Q., Mallonee, D. H., Wells, J. E., Björkhem, I. & Hylemon, P. B. The bile acid-inducible baiF  
450 gene from Eubacterium sp. strain VPI 12708 encodes a bile acid-coenzyme A hydrolase. *J. Lipid*  
451 *Res.* **40**, 17–23 (1999).
- 452 28. González-Pajuelo, M. *et al.* Metabolic engineering of Clostridium acetobutylicum for the industrial  
453 production of 1,3-propanediol from glycerol. *Metab. Eng.* **7**, 329–336 (2005).
- 454 29. Higashide, W., Li, Y., Yang, Y. & Liao, J. C. Metabolic engineering of Clostridium cellulolyticum for  
455 production of isobutanol from cellulose. *Appl. Environ. Microbiol.* **77**, 2727–2733 (2011).
- 456 30. Kovács, K. *et al.* Secretion and assembly of functional mini-cellulosomes from synthetic  
457 chromosomal operons in Clostridium acetobutylicum ATCC 824. *Biotechnol Biofuels* **6**, 117 (2013).
- 458 31. Heap, J. T., Pennington, O. J., Cartman, S. T. & Minton, N. P. A modular system for Clostridium  
459 shuttle plasmids. *J. Microbiol. Methods* **78**, 79–85 (2009).
- 460 32. Wang, Y. *et al.* Bacterial Genome Editing with CRISPR-Cas9: Deletion, Integration, Single  
461 Nucleotide Modification, and Desirable “Clean” Mutant Selection in Clostridium beijerinckii as an  
462 Example. *ACS Synthetic Biology* **5**, 721–732 (2016).
- 463 33. Hang, S. *et al.* Bile acid metabolites control Th17 and Treg cell differentiation. *BioRxiv* (2018).  
464 doi:10.1101/465344
- 465 34. Caldeira, J., Feicht, R., White, H. & Teixeira, M. EPR and Moessbauer spectroscopic studies on  
466 enoate reductase. *Journal of Biological ...* (1996).
- 467 35. Rohdich, F., Wiese, A., Feicht, R., Simon, H. & Bacher, A. Enoate reductases of Clostridia. Cloning,  
468 sequencing, and expression. *J. Biol. Chem.* **276**, 5779–5787 (2001).
- 469 36. Lu, Z. & Imlay, J. A. The Fumarate Reductase of Bacteroides thetaiotaomicron, unlike That of  
470 Escherichia coli, Is Configured so that It Does Not Generate Reactive Oxygen Species. *MBio* **8**,  
471 (2017).
- 472 37. Huo, L. *et al.* Heterologous expression of bacterial natural product biosynthetic pathways. *Nat Prod*  
473 *Rep* (2019). doi:10.1039/c8np00091c
- 474 38. Keasling, J. D. Manufacturing molecules through metabolic engineering. *Science* **330**, 1355–1358  
475 (2010).
- 476 39. Pickens, L. B., Tang, Y. & Chooi, Y.-H. Metabolic engineering for the production of natural products.  
477 *Annu. Rev. Chem. Biomol. Eng.* **2**, 211–236 (2011).
- 478 40. Leppik, R. A. Improved synthesis of 3-keto, 4-ene-3-keto, and 4, 6-diene-3-keto bile acids. *Steroids*  
479 (1983).

## 481 SUPPLEMENTARY INFORMATION

482 Supplementary Tables 1-4 are available in the online version of the paper.

483

## 484 ACKNOWLEDGMENTS

485 We are deeply indebted to Christopher T. Walsh, Dylan Dodd, Colleen O’Loughlin, and members of the  
486 Fischbach and Almo laboratories for helpful comments on the manuscript. This work was supported by  
487 NIH grants DP1 DK113598 (M.A.F.), R01 DK110174 (M.A.F.), P01 GM118303-01 (S.C.A.), U54  
488 GM093342 (S.C.A.), and U54 GM094662 (S.C.A.), the Chan-Zuckerberg Biohub (M.A.F.), an HHMI-  
489 Simons Faculty Scholars Award (M.A.F.), an Investigators in the Pathogenesis of Infectious Disease award  
490 from the Burroughs Wellcome Foundation (M.A.F.), and the Price Family Foundation (S.C.A.).

491

492 **AUTHOR CONTRIBUTIONS**

493 M.F., T.L.G., S.C.A., and M.A.F. conceived and designed the experiments. M.F., T.L.G., Y.V., M.M., L.C.B.,  
494 and C.G. performed experiments. V.P., M.A.F., and M.H.M. conceived and designed the computational  
495 analyses. V.P. performed the computational analyses. M.F., T.L.G., V.P., M.H.M., S.C.A., and M.A.F.  
496 analyzed data and wrote the manuscript. All authors discussed the results and commented on the  
497 manuscript.

498

499 **AUTHOR INFORMATION**

500 Reprints and permissions information is available at [www.nature.com/reprints](http://www.nature.com/reprints). The authors declare no  
501 competing financial interests. Correspondence and requests for materials should be addressed to S.C.A.  
502 ([steve.almo@einstein.yu.edu](mailto:steve.almo@einstein.yu.edu)) or M.A.F. ([fischbach@fischbachgroup.org](mailto:fischbach@fischbachgroup.org)).

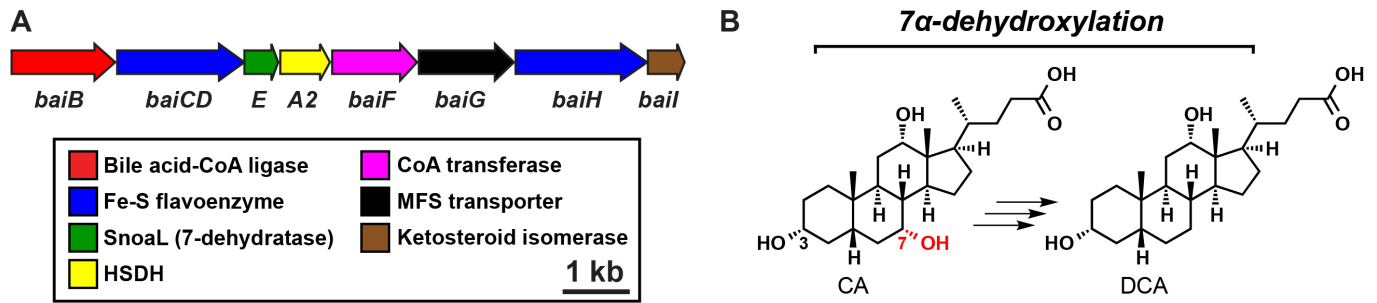

503

504 **Fig. 1. Schematic of the *bai* operon and 7 $\alpha$ -dehydroxylation.** (A) The *bai* operon consists of eight  
505 genes: seven encode enzymes and the eighth, *baiG*, encodes a transporter. It is conserved in every  
506 bacterial species known to 7 $\alpha$ -dehydroxylate primary bile acids, and its gene products have been linked  
507 to specific steps in the pathway. (B) A simplified schematic showing the dehydroxylation of CA to DCA.



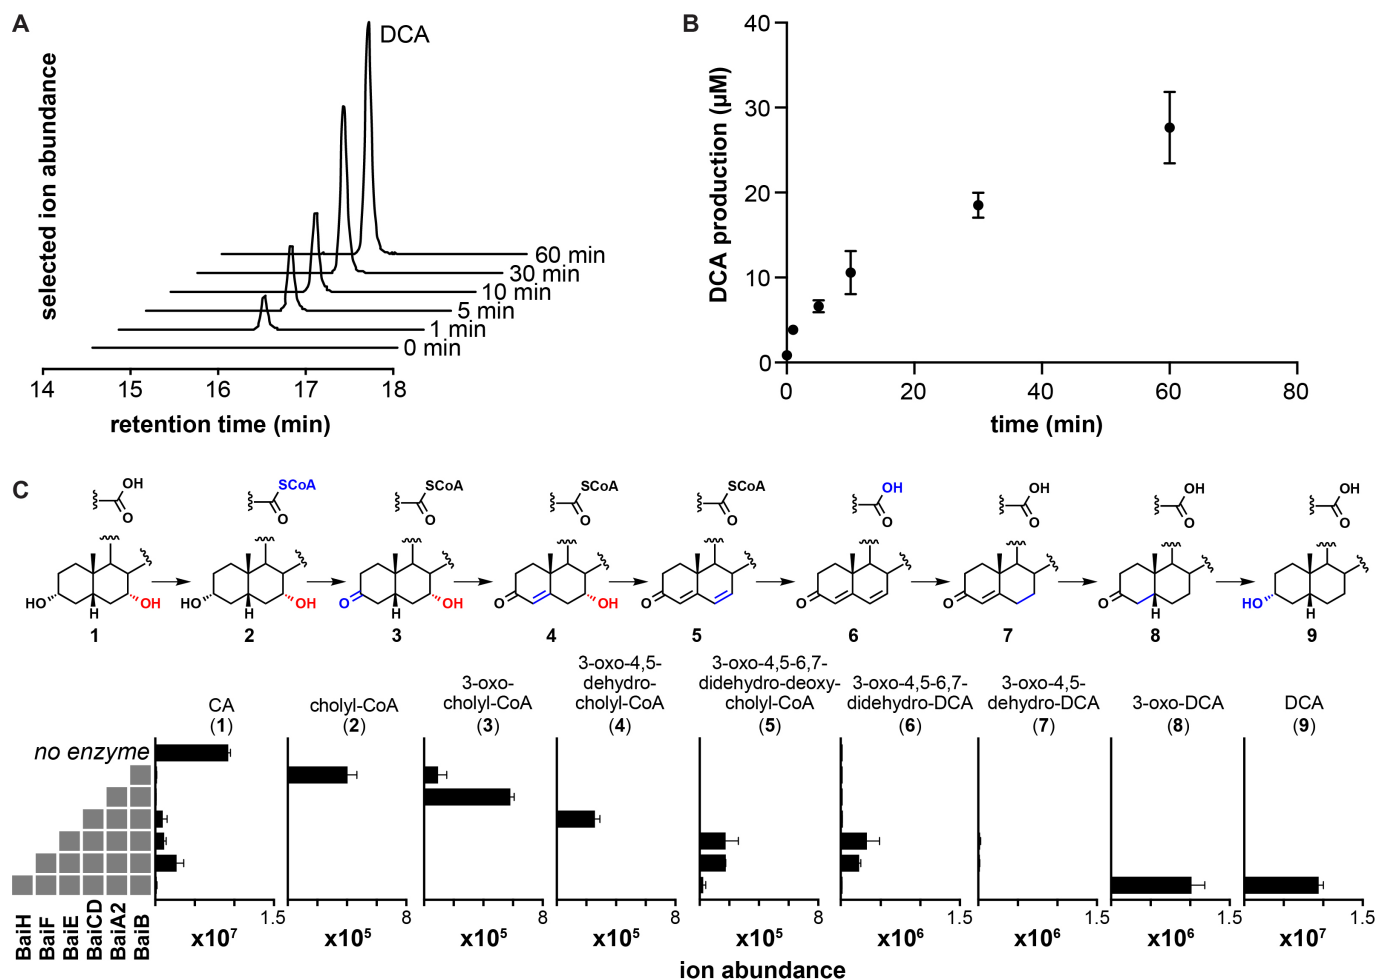

508

509 **Fig. 2. Establishing the complete 7 $\alpha$ -dehydroxylation pathway in vitro.** (A) EICs showing time-  
 510 dependent production of DCA by six purified Bai enzymes. BaiB, BaiCD, BaiA2, BaiE, BaiF, and BaiH were  
 511 purified and assayed anaerobically in the presence of NAD<sup>+</sup>, CoA, and ATP. Reactions were initiated by  
 512 the addition of CA, and aliquots were analyzed by LC-MS at the indicated timepoints. (B) Time course of  
 513 DCA production by a mixture of BaiB, BaiCD, BaiA2, BaiE, BaiF, and BaiH. Data points indicate the  
 514 average level of DCA  $\pm$  one SD (three biological replicates). (C) LC-MS ion abundance for DCA and  
 515 pathway intermediates produced by a step-wise reconstitution assay in which the indicated enzymes were  
 516 co-incubated as described in (A). Error bars indicate mean  $\pm$  SD of three replicates.

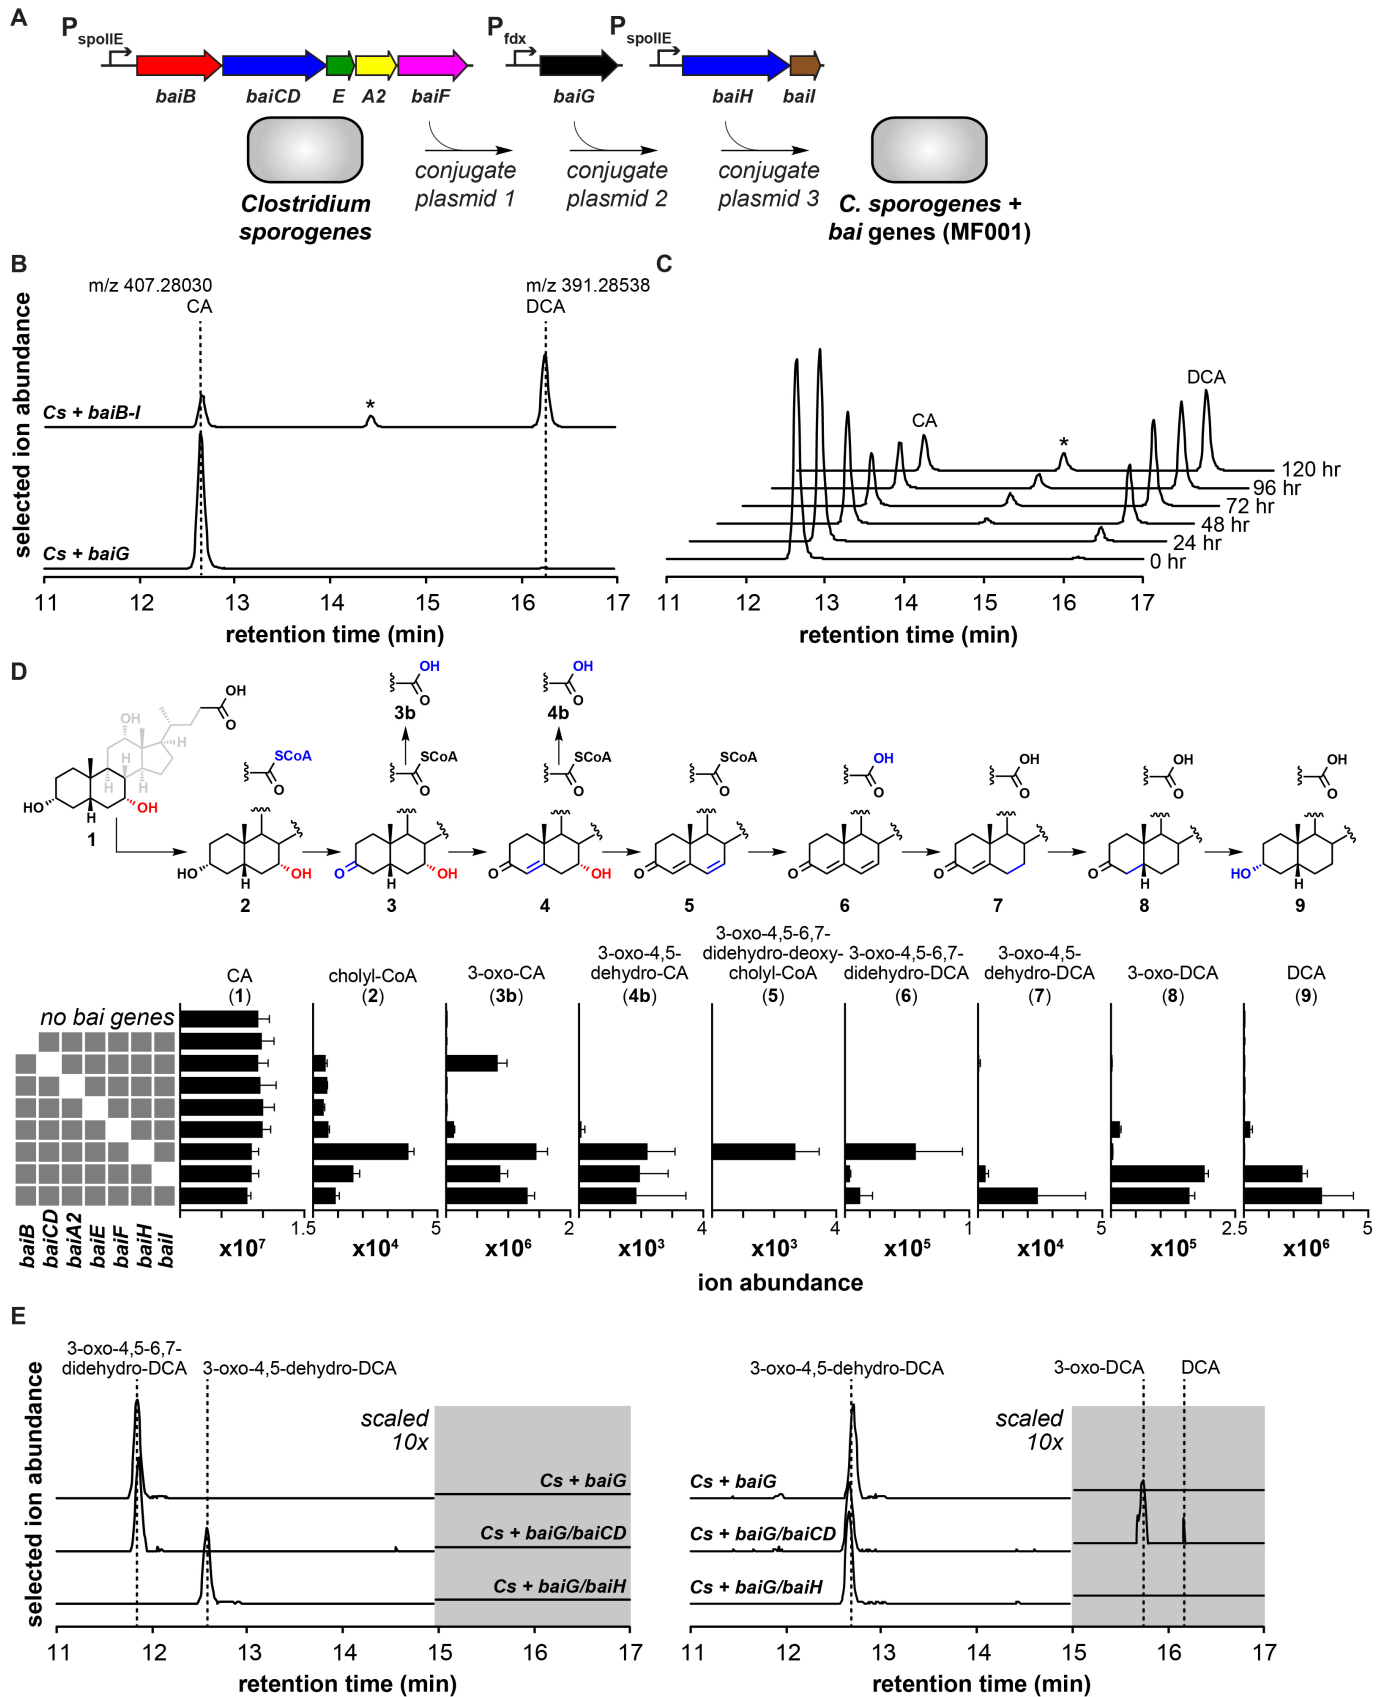

518 **Fig. 3. Transferring the 7 $\alpha$ -dehydroxylation pathway in *Clostridium sporogenes*.** (A) The *bai* operon  
519 was divided among three plasmids: *baiB-baiF* in pMTL83153 (pMF01), *baiG* in pMTL83353 (pMF02), and  
520 *baiH-baiI* in pMTL83253 (pMF03). pMF01, pMF02, and pMF03 were conjugated successively into  
521 *Clostridium sporogenes* ATCC 15579 to create MF001. (B) Combined extracted ion chromatograms (EICs)  
522 showing the conversion of CA to DCA by MF001 versus a control strain of *C. sporogenes* harboring the  
523 transporter *baiG* (MF012). The strains were grown with 1  $\mu$ M CA for 72 hr, extracted with acetone, and  
524 analyzed by LC-MS. The asterisk indicates isoDCA. (C) Combined EICs showing time-dependent  
525 conversion of CA to DCA by MF001. The strain was grown with 1  $\mu$ M CA and aliquots from the indicated  
526 timepoints were analyzed as described in (B). (D) LC-MS ion abundances are shown for DCA, pathway  
527 intermediates, and derivatives produced by *C. sporogenes* strains with single gene deletions within the *bai*  
528 operon. Error bars indicate mean  $\pm$  SD of three replicates. (E) Combined EICs showing the conversion of  
529 3-oxo-4,5,6,7-didehydro-DCA to 3-oxo-4,5-dehydro-DCA by *C. sporogenes* + *baiG/baiH* (left), and the  
530 conversion of 3-oxo-4,5-dehydro-DCA to 3-oxo-DCA by *C. sporogenes* + *baiG/baiCD* (right). Each strain  
531 was cultivated with synthetic 3-oxo-4,5,6,7-didehydro-DCA (left) or 3-oxo-4,5-dehydro-DCA (right) for 72  
532 hr and culture extracts were analyzed as in (B).

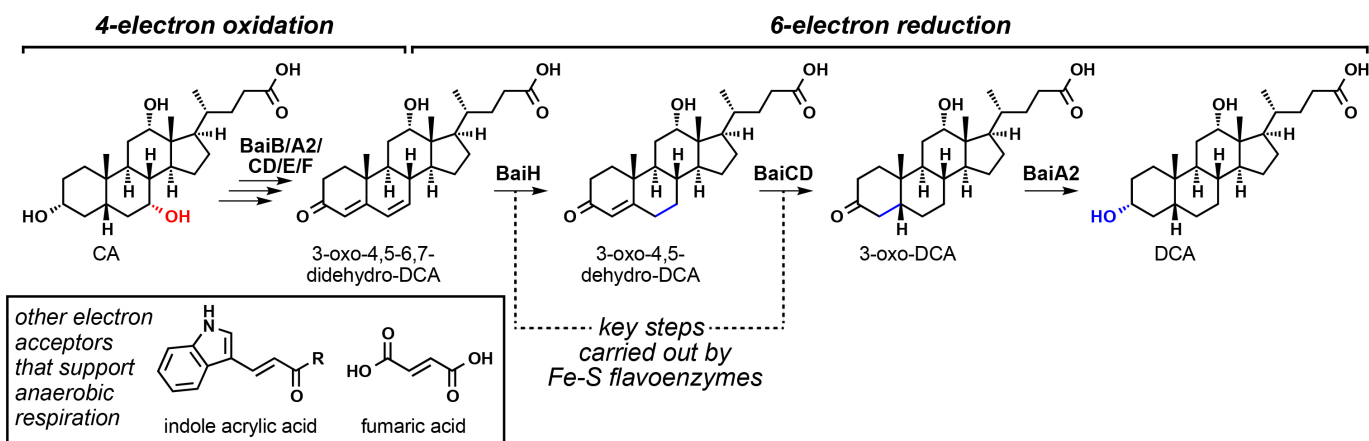

533

534 **Fig. 4. Highly oxidized metabolic intermediates as anaerobic electron acceptors.** In the first half of  
535 the 7 $\alpha$ -dehydroxylation pathway, two successive two-electron oxidations set up a vinylogous dehydration  
536 of the 7-hydroxyl, yielding the highly oxidized intermediate 3-oxo-4,5-6,7-didehydro-DCA. In the second  
537 half of the pathway, three successive two-electron reductions reduce this molecule to DCA, resulting in a  
538 net 2e<sup>-</sup> reduction. The first two of these reductions are carried out by Fe-S flavoenzymes, which harbor a  
539 suite of four cofactors that enable them to convert two-electron inputs to a one-electron manifold. A more  
540 detailed version of the previously proposed pathway is shown in **Extended Data Fig. 1**.

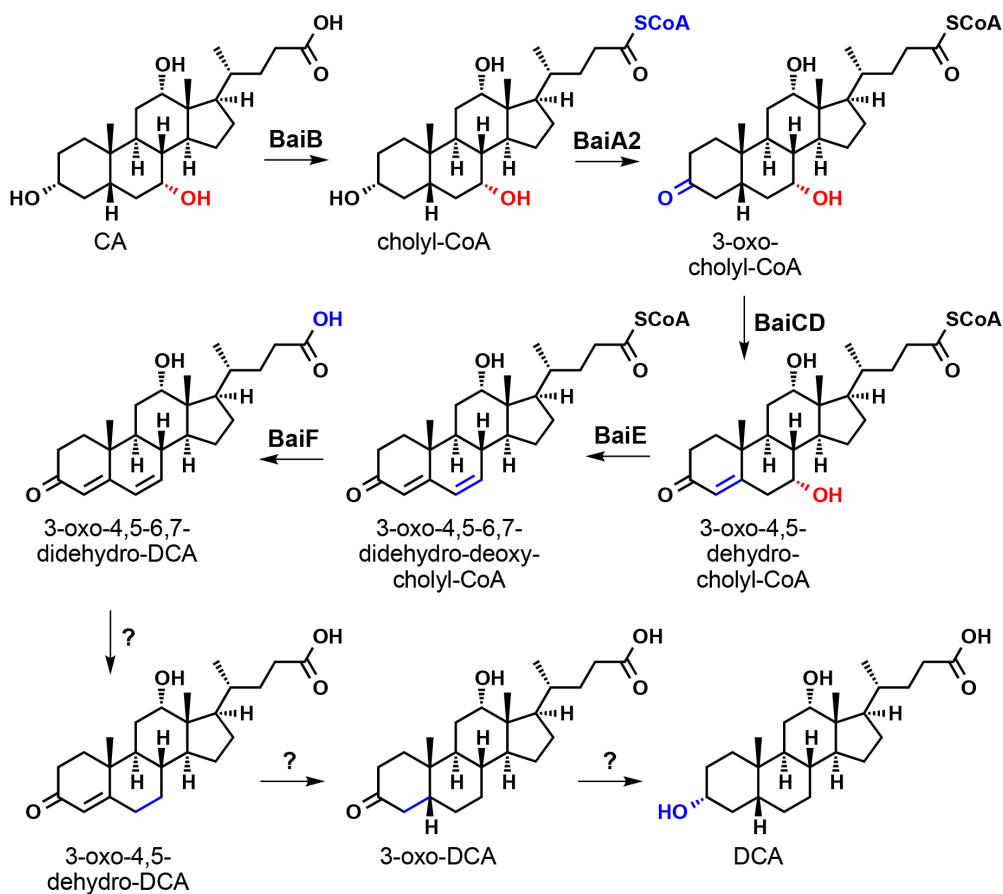

559

560 **Extended Data Fig. 1. Previously proposed pathway for 7 $\alpha$ -dehydroxylation of CA in *C. scindens***

561 **VPI 12708.** See main text for details and a summary of the previous literature.

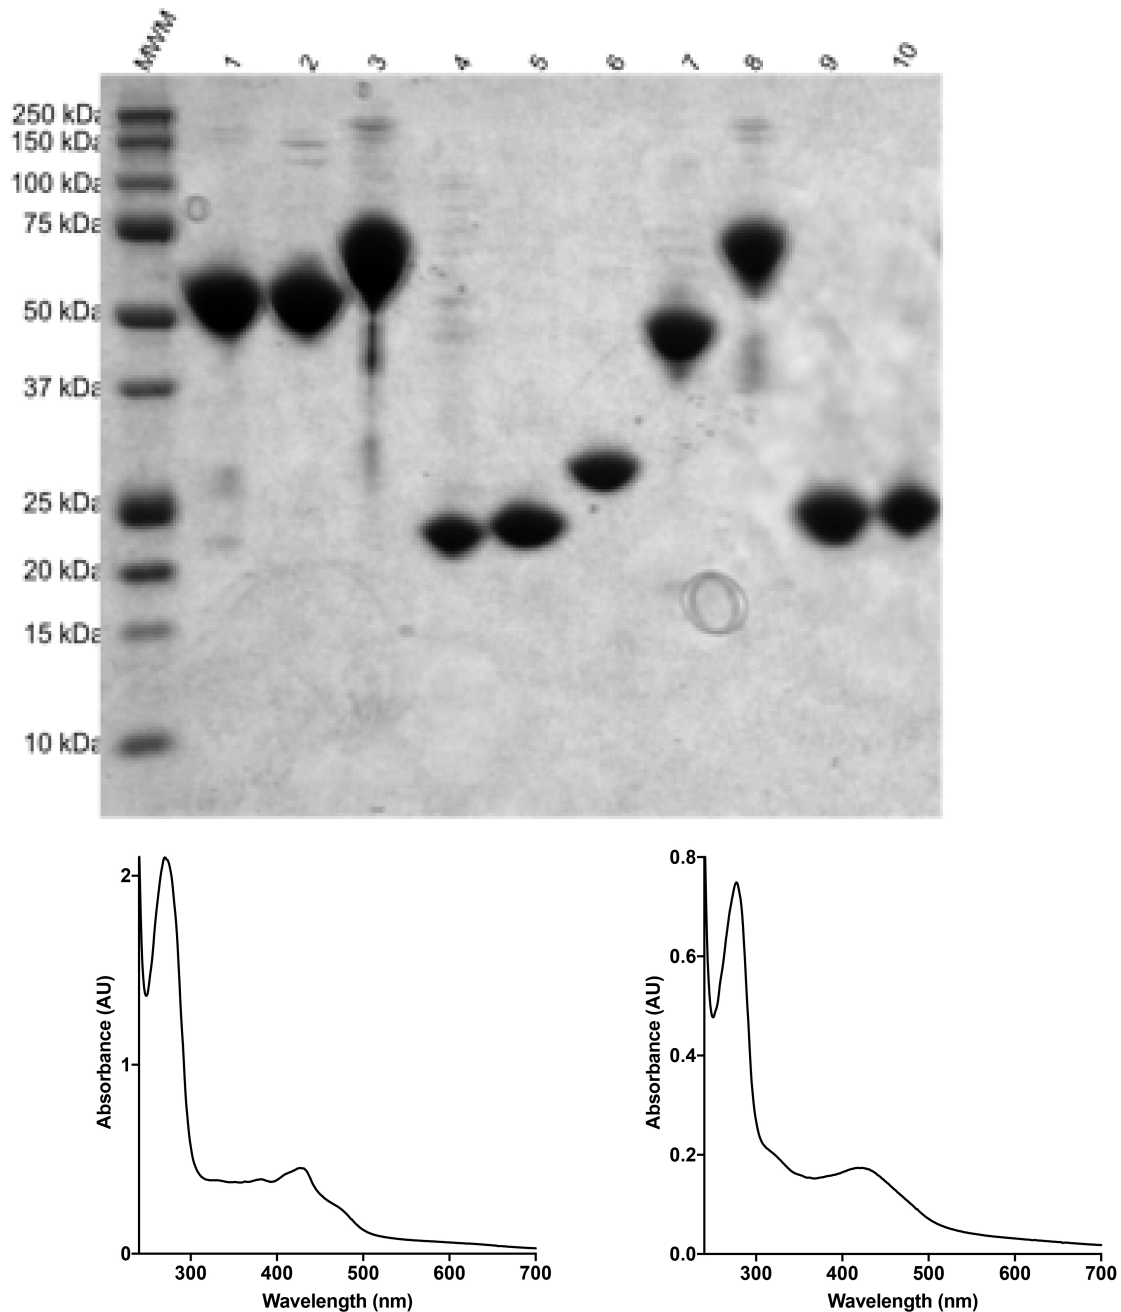

590

591 **Extended Data Fig. 2. Purification of recombinant Bai proteins.** (A) SDS-PAGE analysis of purified Bai  
592 proteins after Ni-affinity and size exclusion purification. MWM, molecular weight marker; 1, BaiB from *C.*  
593 *scindens*; 2, BaiB from *C. hylemonae*; 3, BaiCD from *C. hiranonis*; 4, BaiE from *C. scindens*; 5, BaiE from  
594 *C. hiranonis*; 6, BaiA2 from *C. scindens*; 7, BaiF from *C. hylemonae*; 8, BaiH from *C. scindens*; 9, BaiI from  
595 *C. scindens*; 10, BaiI from *C. hiranonis*. B) UV-visible spectra of BaiCD from *C. hiranonis* (left) and BaiH  
596 from *C. scindens* (right).

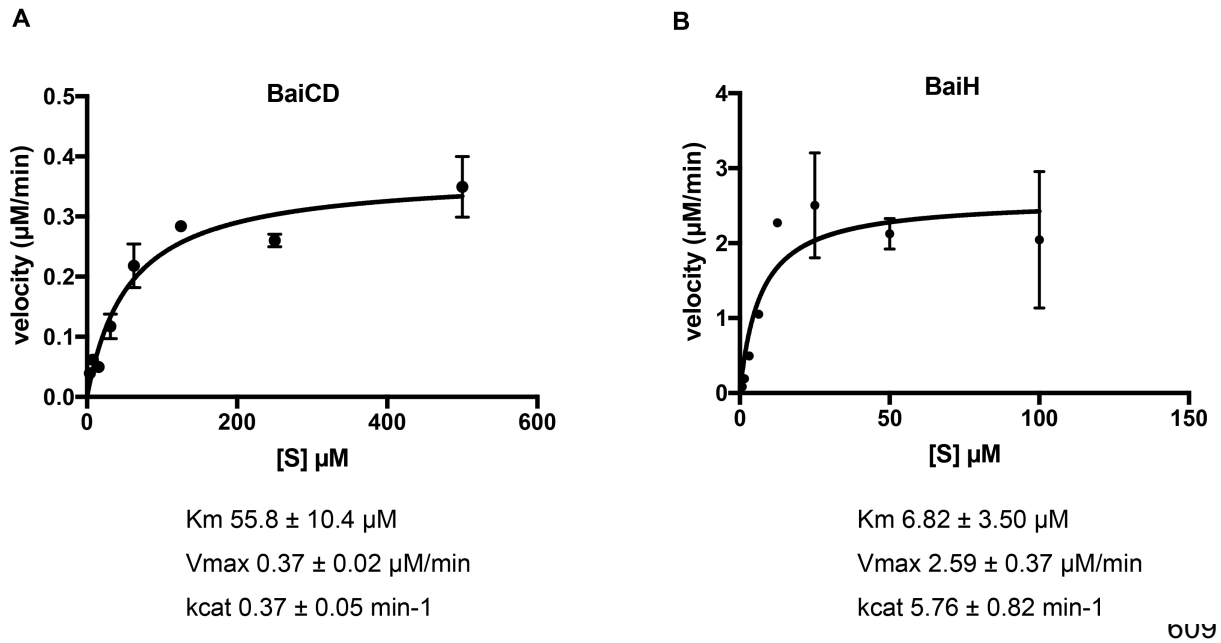

610

611 **Extended Data Fig. 3. Kinetic parameters for BaiCD and BaiH.** (A) Michaelis-Menten analysis of the  
612 conversion of 3-oxo-4,5-dehydro-DCA to 3-oxo-DCA by BaiCD. B) Michaelis-Menten analysis of the  
613 conversion of 3-oxo-4,5,6,7-didehydro-DCA to 3-oxo-4,5-dehydro-DCA by BaiH. Data indicate the average  
614 product level  $\pm$  one SD (three biological replicates).

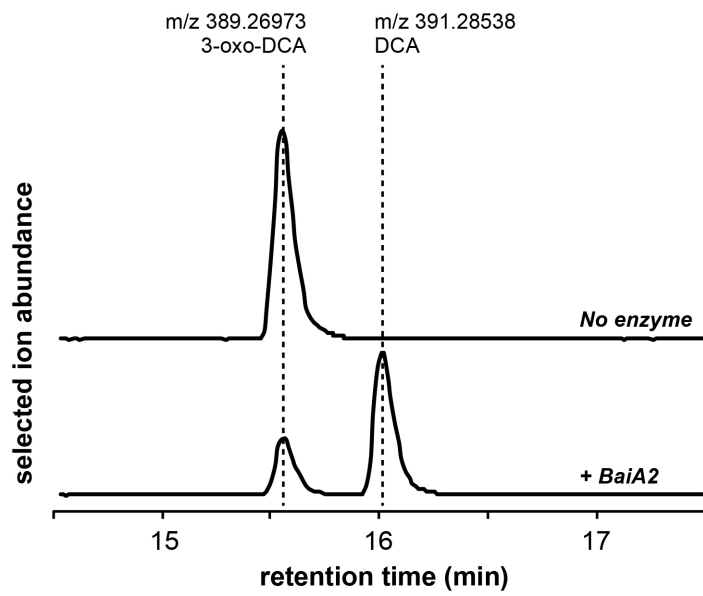

627 **Extended Data Fig. 4. Biochemical analysis of 3-oxo-DCA reduction by BaiA2.** Combined extracted  
628 ion chromatograms showing the conversion of 3-oxo-DCA to DCA by recombinant BaiA2.



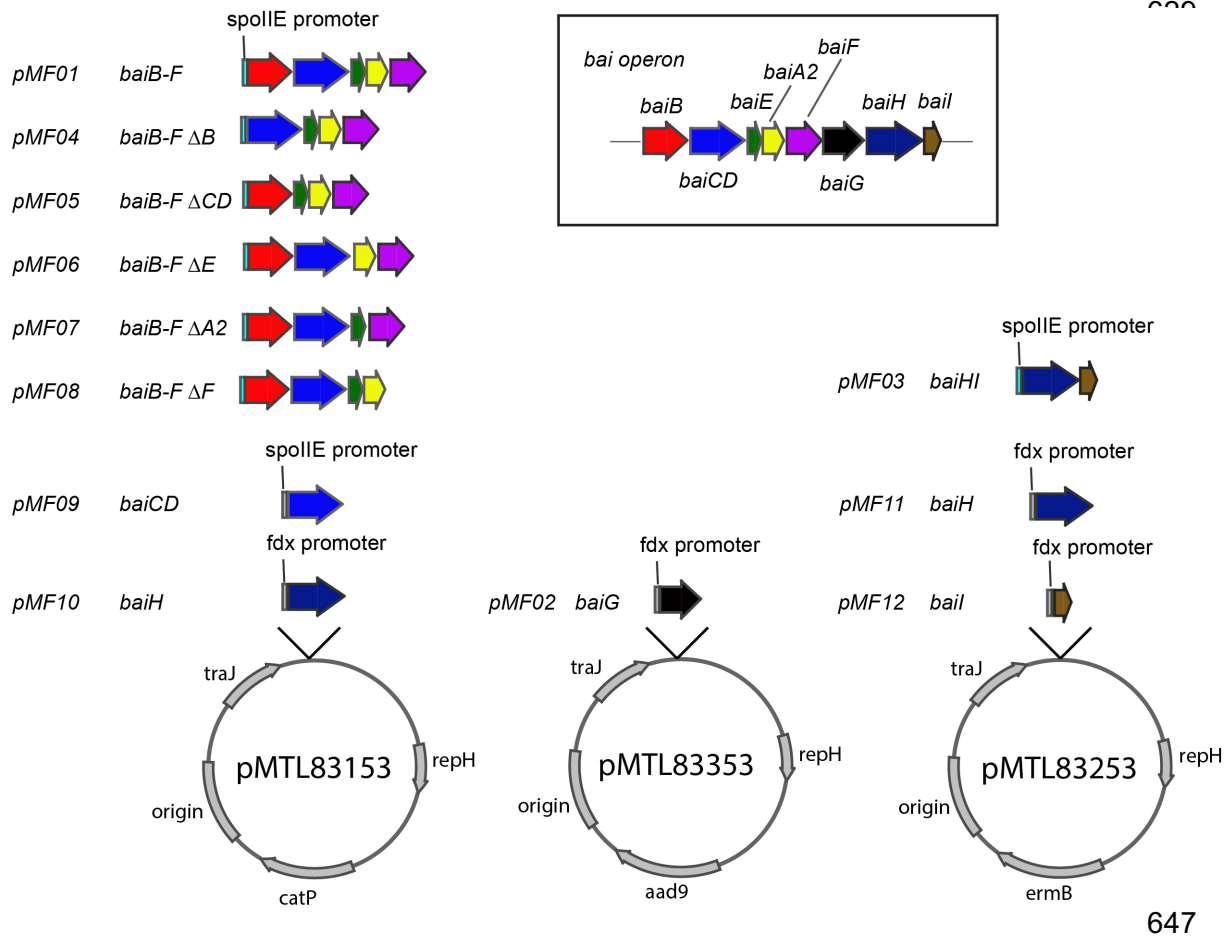

647

648

649 **Extended Data Fig. 5. Constructs for expressing the *bai* operon and portions thereof in *C.***  
 650 ***sporogenes*.** Each of the plasmids has replication origins for *E. coli* and *Clostridium*, *traJ* to enable  
 651 conjugal plasmid transfer, and an antibiotic resistance gene. *bai* genes were introduced into these plasmids  
 652 under the control of the *fdx* or *spoII E* promoter. For the genetic analysis of *baiCD* and *baiH* function,  
 653 pMTL83153-based plasmids were used.

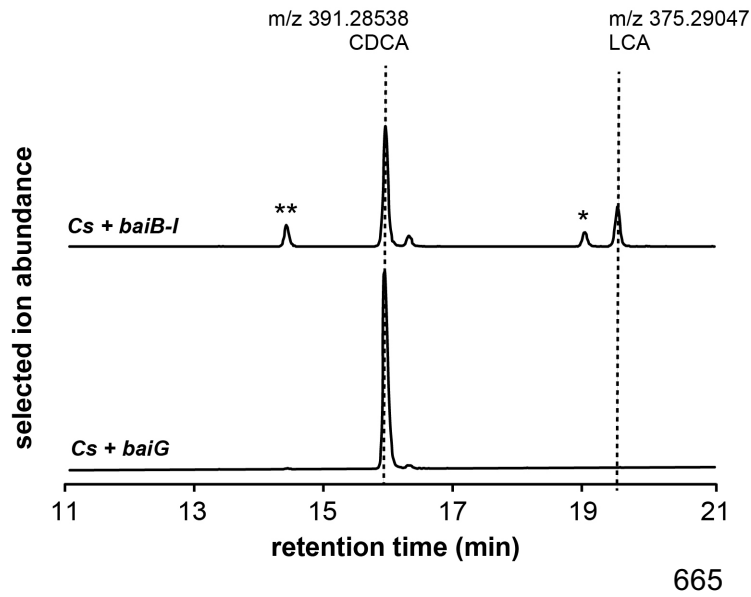

666

667 **Extended Data Fig. 6. 7 $\alpha$ -dehydroxylation of CDCA *in vivo*.** Combined extracted ion chromatograms  
668 showing the conversion of CDCA to LCA by a *C. sporogenes* strain harboring the complete *bai* operon on  
669 three plasmids (MF001) versus a control strain of *C. sporogenes* harboring the transporter *baiG* (MF012).  
670 The strains were cultivated with 1  $\mu$ M CA for 72 hr; an acetone extract of the culture supernatant was  
671 analyzed by HPLC-MS. The single asterisk indicates isoLCA, and the double asterisk is provisionally  
672 assigned as isoCDCA.

## Supplementary Table 1

| Plasmid   | Backbone  | Promoter | Genes introduced                  | Source       |
|-----------|-----------|----------|-----------------------------------|--------------|
| pMTL83153 | pMTL83153 | fdx      |                                   | Nigel Minton |
| pMTL83353 | pMTL83353 | fdx      |                                   | Nigel Minton |
| pMTL83253 | pMTL83253 | fdx      |                                   | Nigel Minton |
| pMF01     | pMTL83153 | spolIE   | <i>baiB_baiCD_baiE_baiA2_baiF</i> | This study   |
| pMF02     | pMTL83353 | fdx      | <i>baiG</i>                       | This study   |
| pMF03     | pMTL83253 | spolIE   | <i>baiH_bail</i>                  | This study   |
| pMF04     | pMTL83153 | spolIE   | <i>baiCD_baiE_baiA2_baiF</i>      | This study   |
| pMF05     | pMTL83153 | spolIE   | <i>baiB_baiE_baiA2_baiF</i>       | This study   |
| pMF06     | pMTL83153 | spolIE   | <i>baiB_baiCD_baiA2_baiF</i>      | This study   |
| pMF07     | pMTL83153 | spolIE   | <i>baiB_baiCD_baiE_baiF</i>       | This study   |
| pMF08     | pMTL83153 | spolIE   | <i>baiB_baiCD_baiE_baiA2</i>      | This study   |
| pMF09     | pMTL83153 | spolIE   | <i>baiCD</i>                      | This study   |
| pMF10     | pMTL83153 | fdx      | <i>baiH</i>                       | This study   |
| pMF11     | pMTL83253 | fdx      | <i>baiH</i>                       | This study   |
| pMF12     | pMTL83253 | fdx      | <i>bail</i>                       | This study   |

## Supplementary Table 2

| Strain | Plasmids                    | Genes                                                   |
|--------|-----------------------------|---------------------------------------------------------|
| MF001  | pMF01, pMF02, pMF03         | <i>baiB, baiCD, baiE, baiA2, baiF, baiG, baiH, bail</i> |
| MF002  | pMF04, pMF02, pMF03         | <i>baiCD, baiE, baiA2, baiF, baiG, baiH, bail</i>       |
| MF003  | pMF05, pMF02, pMF03         | <i>baiB, baiE, baiA2, baiF, baiG, baiH, bail</i>        |
| MF004  | pMF06, pMF02, pMF03         | <i>baiB, baiCD, baiA2, baiF, baiG, baiH, bail</i>       |
| MF005  | pMF07, pMF02, pMF03         | <i>baiB, baiCD, baiE, baiF, baiG, baiH, bail</i>        |
| MF006  | pMF08, pMF02, pMF03         | <i>baiB, baiCD, baiE, baiA2, baiG, baiH, bail</i>       |
| MF007  | pMF01, pMF02, pMF12         | <i>baiB, baiCD, baiE, baiA2, baiF, baiG, bail</i>       |
| MF008  | pMF01, pMF02, pMF11         | <i>baiB, baiCD, baiE, baiA2, baiF, baiG, baiH</i>       |
| MF009  | pMF01, pMF02                | <i>baiB, baiCD, baiE, baiA2, baiF, baiG</i>             |
| MF010  | pMF09, pMF02                | <i>baiCD, baiG</i>                                      |
| MF011  | pMF10, pMF02                | <i>baiH, baiG</i>                                       |
| MF012  | pMTL83153, pMF02, pMTL83253 | <i>baiG</i>                                             |

### SI Table 3: Primers used for heterologous expression vector for *C. sporogenes*

| primer name                     | sequence (5'-3')                                  |
|---------------------------------|---------------------------------------------------|
| pMTL vector for gibson assembly |                                                   |
| 1 pMTL_Fw                       | TGCAGACATGCAAGCTTGGC                              |
| 2 pMTL_Rv                       | TTCGTAATCATGGTCATATG                              |
| 3 pMTL_wo_fdxp_R                | ACACGCGGCCGCGGTCATAGCT                            |
| 4 spollEp_Fw                    | GCGGCCGCGTGTATATTTCTATAAAAAATA                    |
| 5 spollEp_Rv                    | AATAATTAATCACCCCATTAAGTTAC                        |
| used for pMF01                  |                                                   |
| 6 baiB-F_Fw                     | TTAATGGGGGTGATTAATTATTATGCACAAAAAATCAGCGTGTG      |
| 7 baiB-F_Rv                     | GTGCCAAGCTTGCATGTCTGCACTCTTACTCCTCTTTCTTCTCATATG  |
| used for pMF02                  |                                                   |
| 8 baiG_Fw                       | TACATATGACCATGATTACGAAATGAGCACCGTAGCCAATCC        |
| 9 baiG_Rv                       | GTGCCAAGCTTGCATGTCTGCAGCGGCCGAAAATAATCTGGAATGTTTT |
| used for pMF03                  |                                                   |
| 10 baiH-L_Fw                    | TTAATGGGGGTGATTAATTATTATGGATATGAAACATTCCAGATTATTT |
| 11 baiH-L_Rv                    | GTGCCAAGCTTGCATGTCTGCATTAATAAATCACATGTATCCCAC     |
| used for pMF04                  |                                                   |
| 12 ΔbaiB_Fw                     | GATTAATTATTATGAGTTACGAAGCACTTTTTTCACC             |
| 13 ΔbaiB_Rv                     | TCGTAATCATAATAATTAATCACCCCATTAAGTTAC              |
| used for pMF05                  |                                                   |
| 6 baiB_Fw                       | TTAATGGGGGTGATTAATTATTATGCACAAAAAATCAGCGTGTG      |
| 14 baiB_Rv                      | CATATGTATCATTTTGTACTCCTCTTATATAATTTGTTTT          |
| 15 baiE-F_Fw                    | AGGAGTAACAAAATGATACATATGACATTAGAAGAGAGAGT         |
| 7 baiE-F_Rv                     | GTGCCAAGCTTGCATGTCTGCACTCTTACTCCTCTTTCTTCTCATATG  |
| used for pMF06                  |                                                   |
| 6 baiB-F_Fw                     | TTAATGGGGGTGATTAATTATTATGCACAAAAAATCAGCGTGTG      |
| 16 3'baiA2_baiCD_Rv             | TGGCAATCTAGTTTGTACTCCTCTTATATAATTTGTTTT           |
| 17 3'baiCD_baiA2_Fw             | TGGCAATCTAGGAATATTGTAAAAGAAAGGCAGGAGTAA           |
| 7 baiB-F_Rv                     | GTGCCAAGCTTGCATGTCTGCACTCTTACTCCTCTTTCTTCTCATATG  |
| used for pMF07                  |                                                   |
| 18 dbaiA_Fw                     | GGAGTAAGAGTATGGCTGGAATAAAAGATTTTCCAAA             |
| 19 dbaiA_Rv                     | ATTCCAGCCACTACTCTTACTCCTGCCCTTTCTTTTAC            |
| used for pMF08                  |                                                   |
| 20 dbaiF_Fw                     | AGGCTTAAGAATGCAGACATGCAAGCTTGGC                   |
| 21 dbaiF_Rv                     | GCATGTCTGCACTCCTTTTCTATATCACATATTCTACTTAGTAA      |
| used for pMF09                  |                                                   |
| 22 baiCD_Fw                     | TTAATGGGGGTGATTAATTATTATGAGTTACGAAGCACTTTTTTCAC   |
| 23 baiCD_Rv                     | GTGCCAAGCTTGCATGTCTGCACTAGATTGCCATTCTGCGTC        |
| used for pMF10, pMF11           |                                                   |
| 24 baiH_Fw                      | TACATATGACCATGATTACGAAATGGATATGAAACATTCCAGATTATT  |
| 25 baiH_Rv                      | GTGCCAAGCTTGCATGTCTGCATTACAGGCTGTATGCCTTCTCAAATC  |
| used for pMF12                  |                                                   |
| 26 baiI_Fw                      | TACATATGACCATGATTACGAAATGGCAGTGAAGGCAATCTCAGGCTG  |
| 27 baiI_Rv                      | GTGCCAAGCTTGCATGTCTGCATTAATAAATCACATGTATCCCCTCTT  |

**SI Table 4: Primers used for expression of Bai proteins in *E. coli***

| gene name    | unipro ID | species                     | Forward primer                                                      | Reverse primer                                                   |
|--------------|-----------|-----------------------------|---------------------------------------------------------------------|------------------------------------------------------------------|
| <i>baiB</i>  | P19409    | <i>C. scindens</i> VPI12708 | TACTTCCAATCCATGCA<br>CAAAAAATCAGCGTGTGA<br>GAGG                     | TATCCACCTTTACTGTTATCCCCCG<br>CGGGCAATACAATC                      |
| <i>baiB</i>  | C0C3H0    | <i>C. hylemonae</i>         | TACTTCCAATCCATGGA<br>CTTGATGGGTGATTTTTT<br>TAACAAGTTTAATC           | TATCCACCTTTACTGTTATTCTTTGC<br>AGGAACATTTTTCCCGC                  |
| <i>baiB</i>  | B6FW28    | <i>C. hiranonis</i>         | TACTTCCAATCCATGAAT<br>GATGTGAAATGTAATAT<br>TTTAATAAATTTAATACAG<br>G | TATCCACCTTTACTGTTAGCAAAGTT<br>TATTAAGTAGATTTTTTCTATTAAGC<br>C    |
| <i>baiCD</i> | P19410    | <i>C. scindens</i> VPI12708 | TACTTCCAATCCATGAGT<br>TACGAAGCACTTTTTTCA<br>CCATTC                  | TATCCACCTTTACTGTTAGATTGCCA<br>TTCCTGCGTCATAGC                    |
| <i>baiCD</i> | C0C3H1    | <i>C. hylemonae</i>         | TACTTCCAATCCATGGG<br>TTACGAAGCACTATTTTC<br>ACCATTC                  | TATCCACCTTTACTGTTACTGCAGC<br>GCCATACCCGC                         |
| <i>baiCD</i> | Q9RB48    | <i>C. hiranonis</i>         | TACTTCCAATCCATGAGT<br>TACGACGCACTTTTTTCA<br>CCATTTAAAATC            | TATCCACCTTTACTGTTATATACTCA<br>TACCTACTTCGTAACCTTC                |
| <i>baiE</i>  | P19412    | <i>C. scindens</i> VPI12708 | TACTTCCAATCCATGATA<br>CATATGACATTAGAAGAG<br>AGAGTTGAAG              | TATCCACCTTTACTGTTATTTGTGCA<br>TGTTTCATCGTGATATGGATC              |
| <i>baiE</i>  | B4YSU1    | <i>C. hylemonae</i>         | TACTTCCAATCCATGAGT<br>ATTGAAGAAAGATTAGAA<br>GCATTGGAAAAAG           | TATCCACCTTTACTGTTATTTTGTGTT<br>TGTGCATGTTTCATCGTGATC             |
| <i>baiE</i>  | Q9RB47    | <i>C. hiranonis</i>         | TACTTCCAATCCATGACT<br>TTAGAAGCAAGAATAGAA<br>GCATTAGAAAAAG           | TATCCACCTTTACTGTTATTTTTCTT<br>TATGCATGTTGCTAGTTATATGTATT<br>TTTG |
| <i>baiA2</i> | P19337    | <i>C. scindens</i> VPI12708 | TACTTCCAATCCATGAAT<br>CTCGTACAAGACAAAGTT<br>ACGATC                  | TATCCACCTTTACTGTTATGGTCTGT<br>AAGCCCCGTCTAC                      |
| <i>baiA2</i> | B4YST2    | <i>C. hylemonae</i>         | TACTTCCAATCCATGAAA<br>CTTGACAGGACAAAATC<br>ACAGTTATC                | TATCCACCTTTACTGTTATGGCCTG<br>TATGCCCCGTCTAC                      |
| <i>baiA2</i> | B6FW31    | <i>C. hiranonis</i>         | TACTTCCAATCCATGAAC<br>TTAGTACAGGACAAAATA<br>GTTATAATAACAG           | TATCCACCTTTACTGTTATGATGGTC<br>TATAAGCACCGTCAAC                   |
| <i>baiF</i>  | P19413    | <i>C. scindens</i> VPI12708 | TACTTCCAATCCATGGC<br>TGAATAAAAAGATTTTCC<br>AAAATTCGG                | TATCCACCTTTACTGTTACTCCTCTT<br>TCTTTCTCATATGTGGAATTAC             |

|             |        |                             |                                                            |                                                       |
|-------------|--------|-----------------------------|------------------------------------------------------------|-------------------------------------------------------|
| <i>baiF</i> | B4YSU2 | <i>C. hylemonae</i>         | TACTTCCAATCCATGGC<br>TGGTTTAAAAGATTTTCC<br>AAGTTTCG        | TATCCACCTTTACTGTTATTCATCTT<br>TCATGTGAGGAATCACTTC     |
| <i>baiF</i> | Q9RB45 | <i>C. hiranonis</i>         | TACTTCCAATCCATGGC<br>TGGATTAAGATTTTCC<br>TAAATTTGGTG       | TATCCACCTTTACTGTTATTTATCTT<br>TTTTAGCCATGTGAGGTATAACC |
| <i>baiH</i> | P32370 | <i>C. scindens</i> VPI12708 | TACTTCCAATCCATGGAT<br>ATGAAACATTCCAGATTA<br>TTTTCGCC       | TATCCACCTTTACTGTTACAGGCTG<br>TATGCCTTCTCAAATC         |
| <i>baiH</i> | C0C3H5 | <i>C. hylemonae</i>         | TACTTCCAATCCATGAGA<br>ACAATTAAGAAAAGAGG<br>TATGTTTTAATGG   | TATCCACCTTTACTGTTACAGACTGT<br>AGGCAGCTTCAAATC         |
| <i>baiH</i> | A5A8R6 | <i>C. hiranonis</i>         | TACTTCCAATCCATGGAT<br>ATGAAAAATTCTAAACTA<br>TTCTCACCTTTAAC | TATCCACCTTTACTGTTATAAGCTGT<br>ATGCTGCTTCGAAAGC        |
